# Supplementary material
Source: PubMed Central journal article supplement (PMC3943335)
Supplement: NIHMS505810-supplement-01.pdf [file NIHMS505810-supplement-01.pdf]

## SUPPLEMENTAL DATA

### Supplemental Figure 1-3

**Supplemental Video A: Confocal stack of HEK-PPG-19Fc[FUT7<sup>+</sup>] labeled with a FITC conjugated goat anti-human IgG antibody (F(ab')<sub>2</sub> fragment). 19Fc[FUT7<sup>+</sup>] is localized on cell membrane.**

**Supplemental Video B: Confocal stack of MSC-PPG-19Fc[FUT7<sup>+</sup>] labeled with a FITC conjugated goat anti-human IgG antibody (F(ab')<sub>2</sub> fragment). 19Fc[FUT7<sup>+</sup>] is localized on cell membrane.**

**Supplemental Video C: MSCs captured on stimulated HUVEC cells at 2 dyn/cm<sup>2</sup>.**  
Representative movie of Figure 5B

**Supplemental Video D: MSCs captured on stimulated HUVEC cells at 0.5-4 dyn/cm<sup>2</sup> under continuous flow conditions.** Representative movie of Figure 6A

**Supplemental Video E: MSCs retained on stimulated HUVEC cells at 0.5-10 dyn/cm<sup>2</sup> after capture under static conditions.** Representative movie of Figure 6B

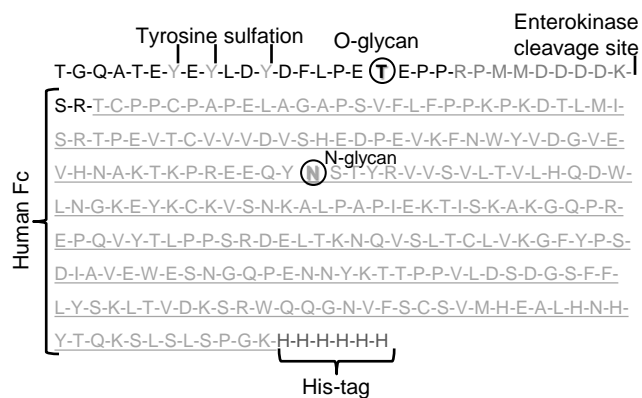

**Supplemental Figure S1: 19Fc[FUT7<sup>+</sup>] protein sequence showing site for O- and N-glycosylation.**

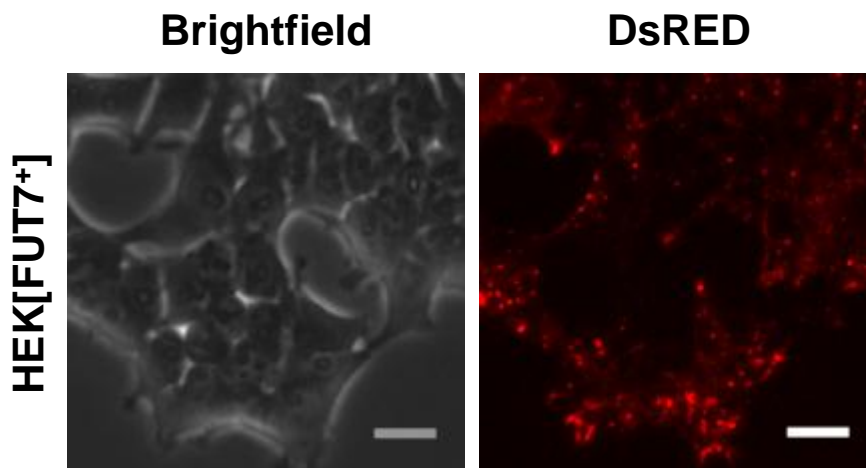

**Supplemental Figure S2: Expression of FUT7-DsRED fusion protein in HEK intra-cellular compartments. Scale = 20  $\mu$ m**

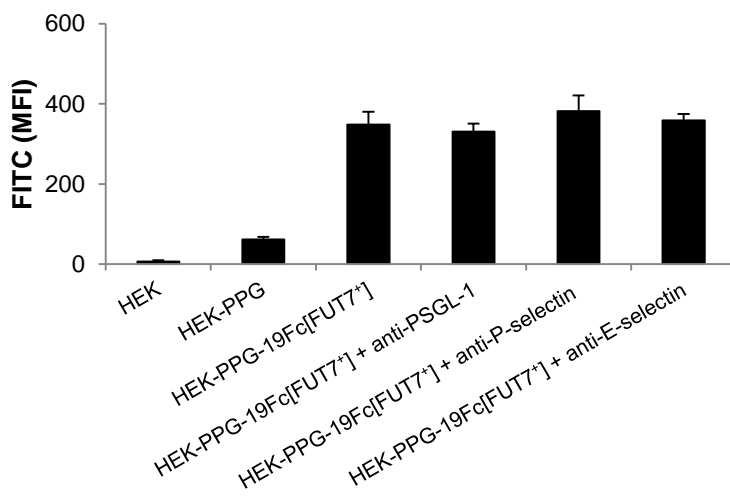

**Supplemental Figure S3: Blocking antibodies do not displace 19Fc[FUT7<sup>+</sup>] bound to cells.** FITC conjugated goat anti-human IgG antibody was used to detect 19Fc[FUT7<sup>+</sup>]. As its signal does not change with the addition of blocking antibodies, 19Fc[FUT7<sup>+</sup>] is not displaced by the blocking antibodies. HEK-PPG-19Fc[FUT7<sup>+</sup>] are not significantly different from HEK-PPG-19Fc[FUT7<sup>+</sup>] + anti-PSGL-1, HEK-PPG-19Fc[FUT7<sup>+</sup>] + anti-P-selectin, and HEK-PPG-19Fc[FUT7<sup>+</sup>] + anti-E-selectin.
